# Supplementary material
Source: ML conference proceedings conference paper supplement (https://openaccess.thecvf.com/content/CVPR2023/html/Du_Conditional_Generation_of_CVPR_2023_paper.html)
Supplement: Supplementary file 1 [file Du_Conditional_Generation_of_CVPR_2023_supplemental.zip]

Archive with 2 entries (2 files):
- Conditional_Generation_of_Audio_from_Video_vis_Foley_Analogies_supplementary_CVPR.pdf
- result_video_camera_ready_720p.mp4
